# Supplementary material
Source: PubMed Central journal article supplement (PMC10151428)
Supplement: NIHMS1852251-supplement-Supp1.pdf [file NIHMS1852251-supplement-Supp1.pdf]

## **KIT Genetic Alterations in Breast Cancer**

**Vahdatinia et al**

**Supplementary Materials**

**Supplementary Table S1**

**Supplementary Table S1. Clinicopathologic characteristics of breast cancer harboring oncogenic/likely oncogenic alterations affecting KIT from The Cancer Genome Atlas Study**

| <b>Sample ID</b> | <b>Sample type</b> | <b>Histology</b> | <b>Grade</b> | <b>ER</b> | <b>HER2</b> | <b>ER/HER2</b> | <b><i>KIT</i> genetic alteration</b> |
|------------------|--------------------|------------------|--------------|-----------|-------------|----------------|--------------------------------------|
| TCGA-KIT1        | Primary            | IDC-NST          | 3            | Negative  | Negative    | ER-/HER2-      | Amplification                        |
| TCGA-KIT2        | Primary            | IDC-NST          | 3            | Negative  | Negative    | ER-/HER2-      | Amplification                        |
| TCGA-KIT3        | Primary            | IDC-NST          | 3            | Negative  | Negative    | ER-/HER2-      | Amplification                        |
| TCGA-KIT4        | Primary            | IDC-NST          | 3            | Negative  | Positive    | HER2+          | Amplification                        |
| TCGA-KIT5        | Primary            | IDC-NST          | 3            | Positive  | Positive    | HER2+          | Amplification                        |
| TCGA-KIT6        | Primary            | IDC-NST          | 3            | Positive  | Negative    | ER+/HER2-      | Amplification                        |
| TCGA-KIT7        | Primary            | IDC-NST          | 3            | Negative  | Negative    | ER-/HER2-      | Amplification                        |
| TCGA-KIT8        | Primary            | IDC-NST          | 3            | Negative  | Positive    | HER2+          | Amplification                        |
| TCGA-KIT9        | Primary            | IDC-NST          | 3            | Negative  | Negative    | ER-/HER2-      | Amplification                        |
